# Supplementary material for: Macrophage-derived extracellular vesicles transfer mitochondria to adipocytes and promote adipocyte–myofibroblast transition in epidural fibrosis
Source: PubMed Central journal article supplement — NPJ Regen Med. 2024 Dec 30;9:43. doi: 10.1038/s41536-024-00388-6 (PMC11685489; doi:10.1038/s41536-024-00388-6), 2024-12-30

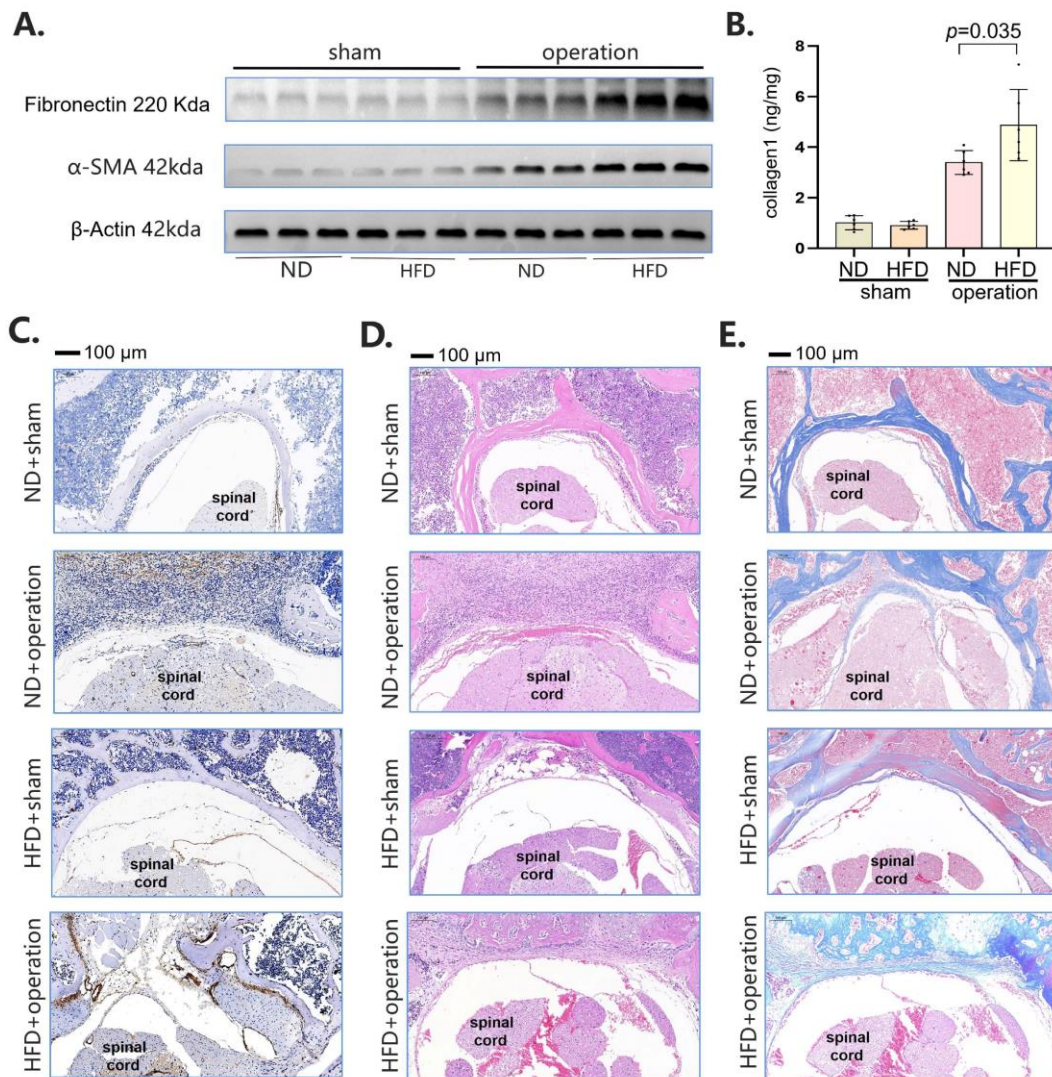

1

2 **Supplementary Figure 1. HFD promoted epidural fibrosis.** (A) Western blot

3 analysis of fibronectin and  $\alpha$ -SMA in obese mice induced with a high-fat diet

4 and normal control mice. (B) ELISA analysis of collagen-1 in obese mice fed a

5 high-fat diet and normal control mice. (C) Immunohistochemical staining of  $\alpha$ -

6 SMA (brown) in obese mice induced by a high-fat diet and normal control mice.

7 (D) HE staining of obese mice induced with a high-fat diet and normal control

8 mice. (E) Masson's trichrome staining of the obese mice fed a high-fat diet and

9 normal control mice. All the data are presented as the mean  $\pm$  Standard Error

10 of the Mean (SEM).

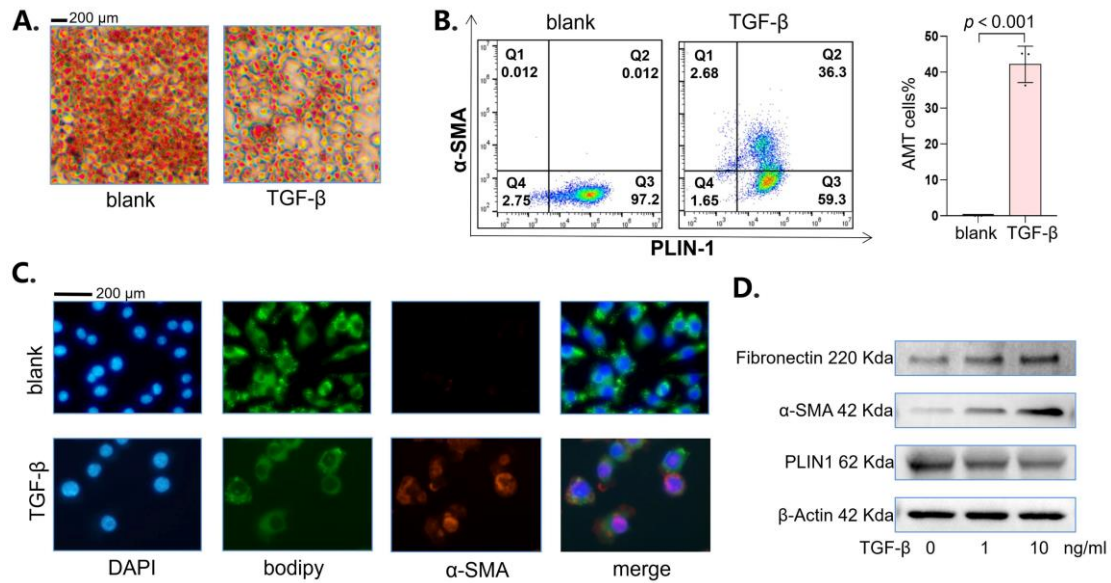

11

12 **Supplementary Figure 2. TGF-β promoted fibrosis in adipocytes.** (A) Oil  
 13 Red O staining of adipocytes treated with or without TGF-β. (B) PLIN1 and α-  
 14 SMA expression in adipocytes was detected via flow cytometry. On the left are  
 15 typical images of flow cytometry, and on the right is the statistical graph after  
 16 the experiment was repeated three times. (C) Immunofluorescence images of  
 17 PLIN1 and α-SMA in adipocytes treated with or without TGF-β. (D) Western blot  
 18 analysis of fibronectin, α-SMA and PLIN1 in adipocytes treated with different  
 19 doses of TGF-β. All the data are presented as the mean ± Standard Error of the  
 20 Mean (SEM).

21

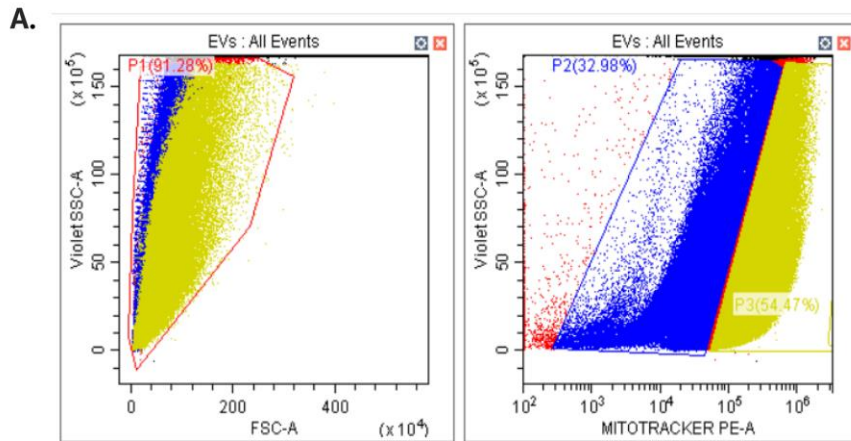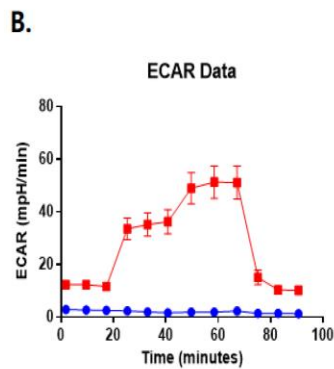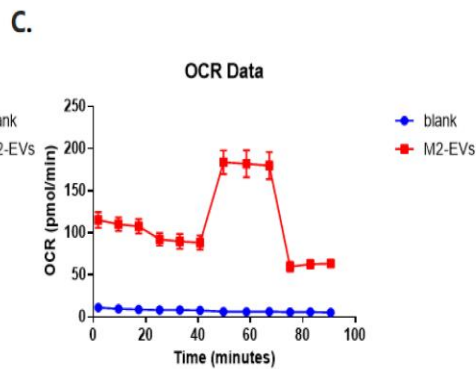

22

23 **Supplementary Figure 3. Vesicle sorting and metabolic intervention in**

24 **adipocytes.** (A) Vesicles were stained with MitoTracker Red and then sorted

25 by flow cytometry according to MitoTracker expression. (B) ECAR levels in

26 adipocytes were detected with a Seahorse assay after treatment with M2-EVs.

27 (C) OCRs in adipocytes were detected with a Seahorse assay after treatment

28 with M2-EVs. All the data are presented as the mean  $\pm$  Standard Error of the

29 Mean (SEM).

30

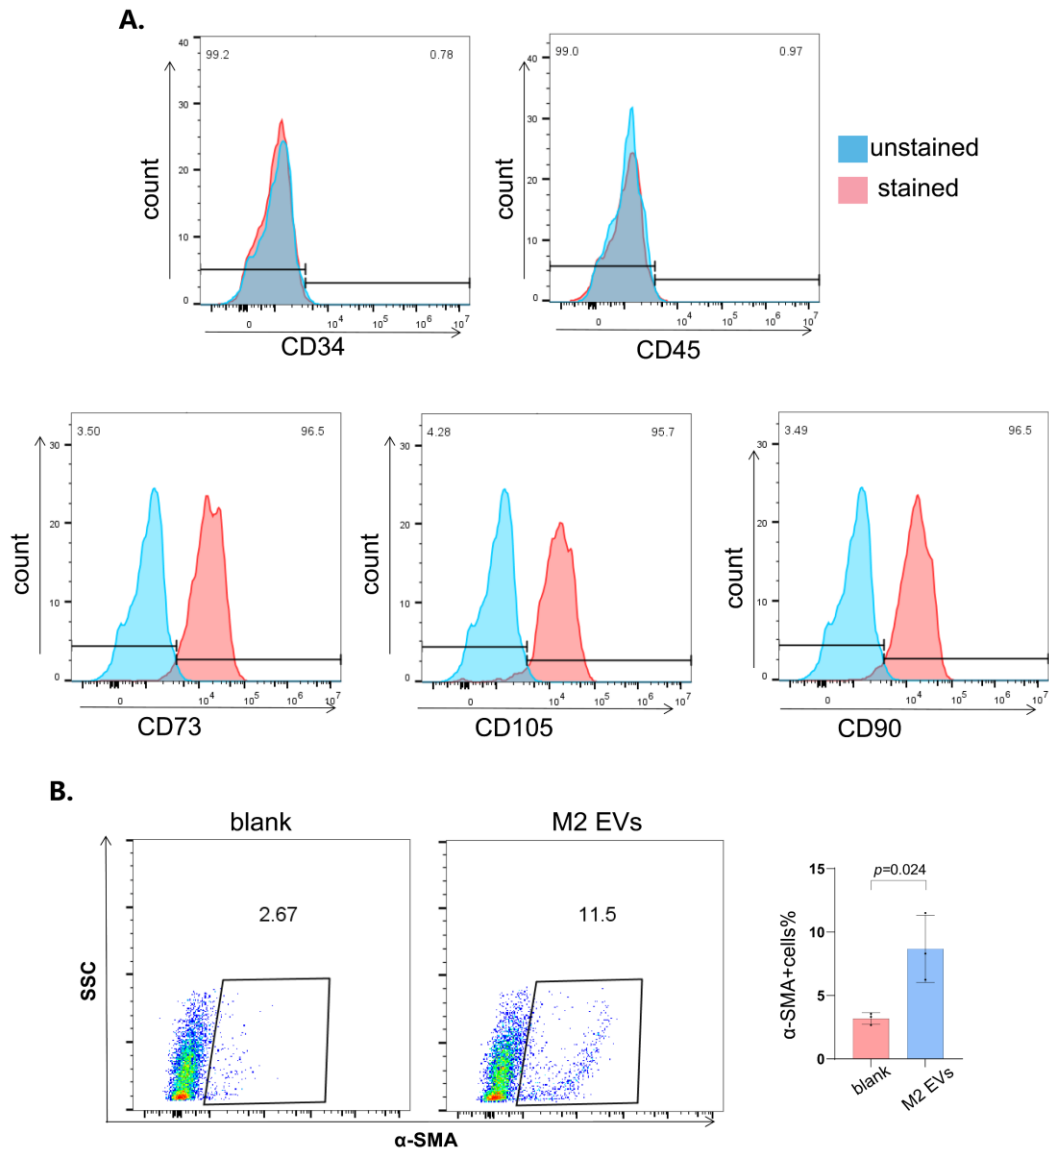

31

32 **Supplementary Figure 4. Mesenchymal stem cells can transdifferentiate**

33 **into myofibroblasts. (A)** Mesenchymal stem cells purified from mouse bone

34 marrow were identified with the markers CD34, CD45, CD73, CD105, and

35 CD90. (B)  $\alpha$ -SMA expression in mesenchymal stem cells was detected via flow

36 cytometry. All the data are presented as the mean  $\pm$  Standard Error of the Mean

37 (SEM).

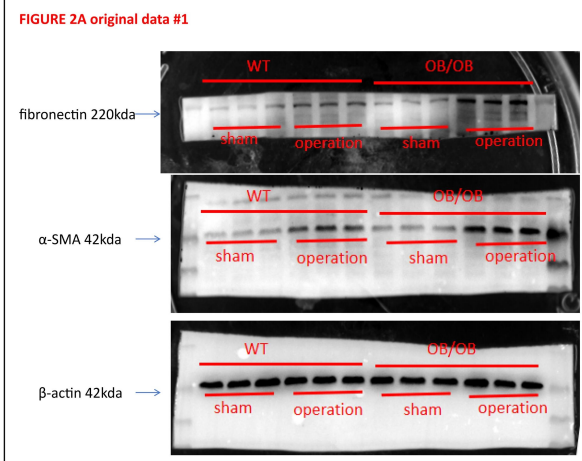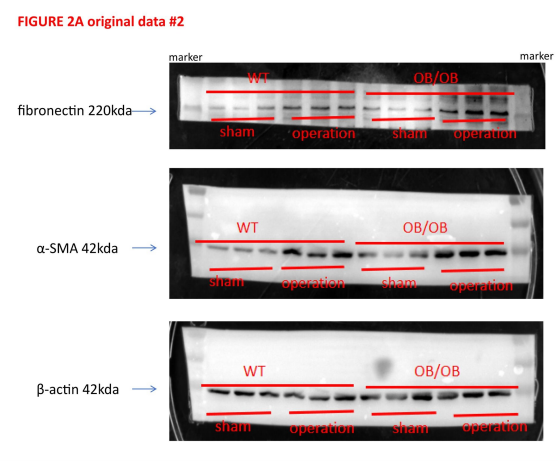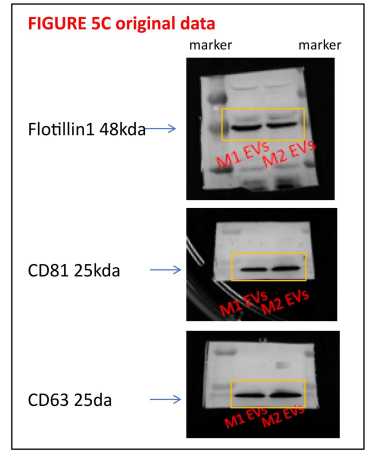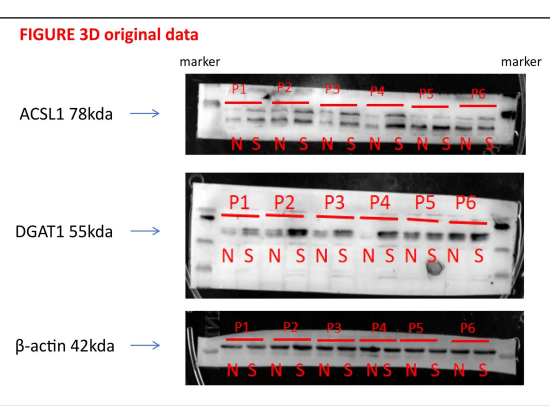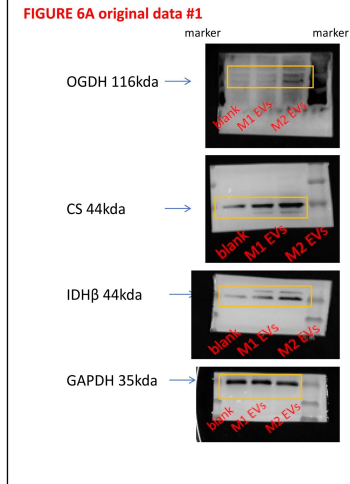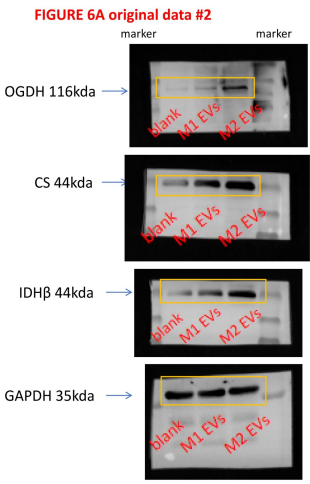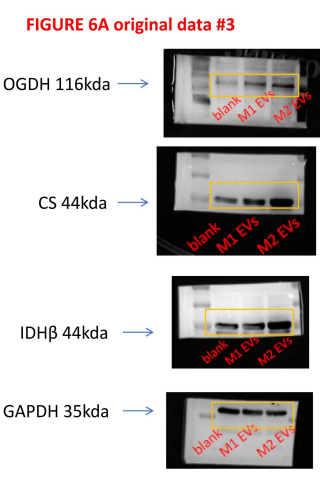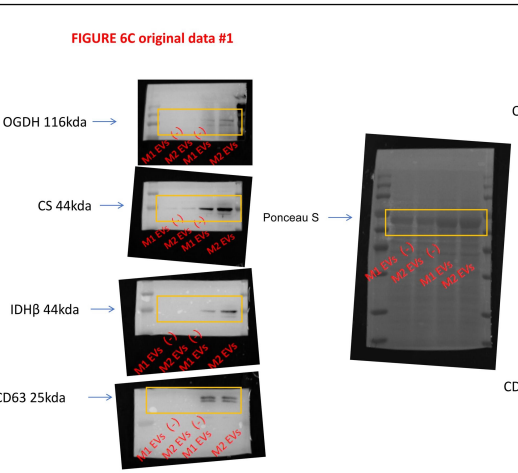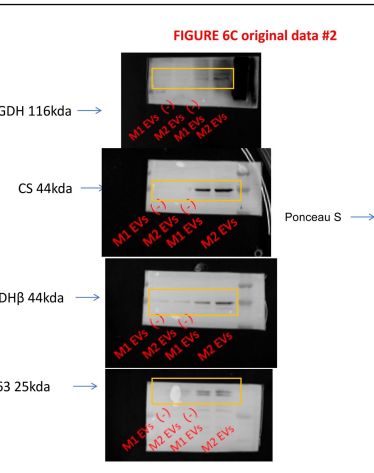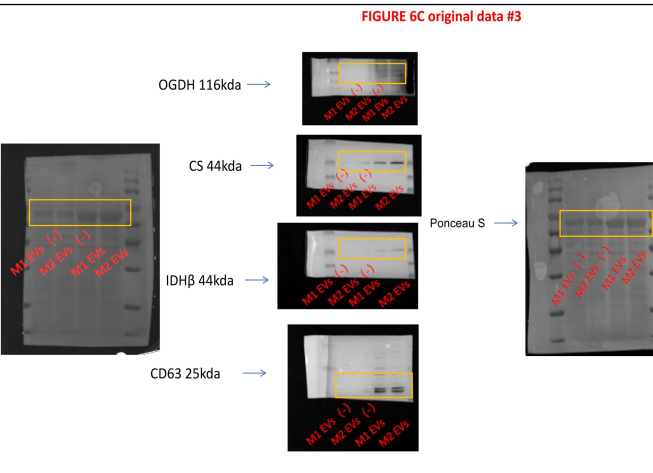

FIGURE 7G original data #1

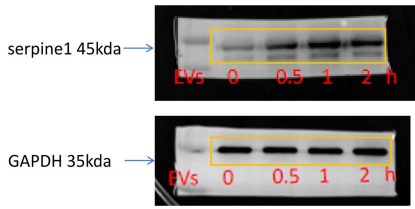

FIGURE 7G original data #2

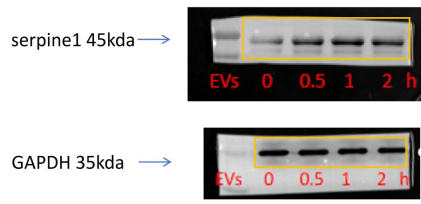

FIGURE 7G original data #3

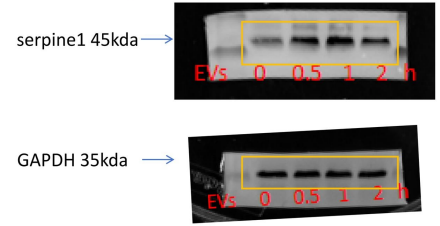

FIGURE 7H original data #1

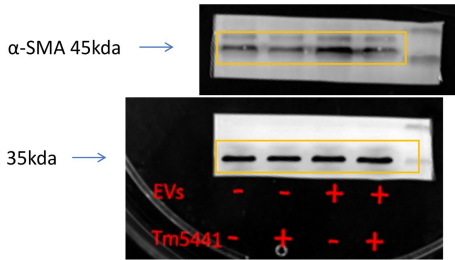

FIGURE 7H original data #2

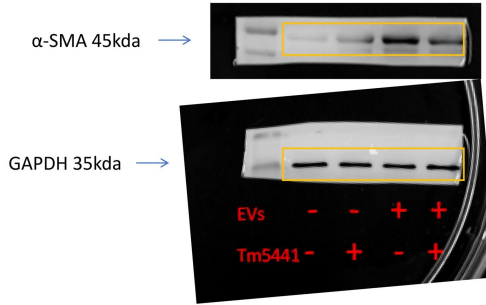

FIGURE 7H original data #3

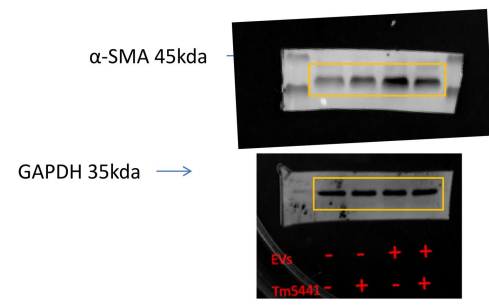

supplementary FIGURE 1A original data #1

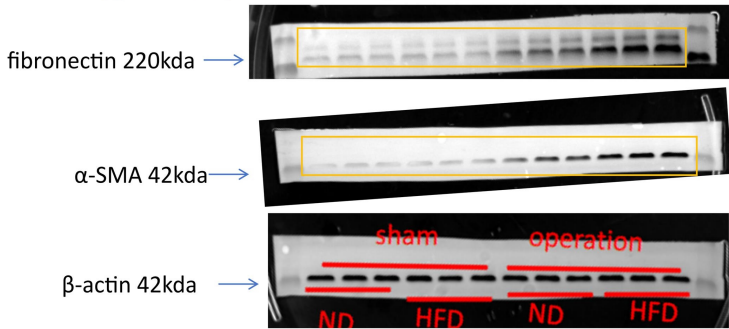

supplementary FIGURE 1A original data #2

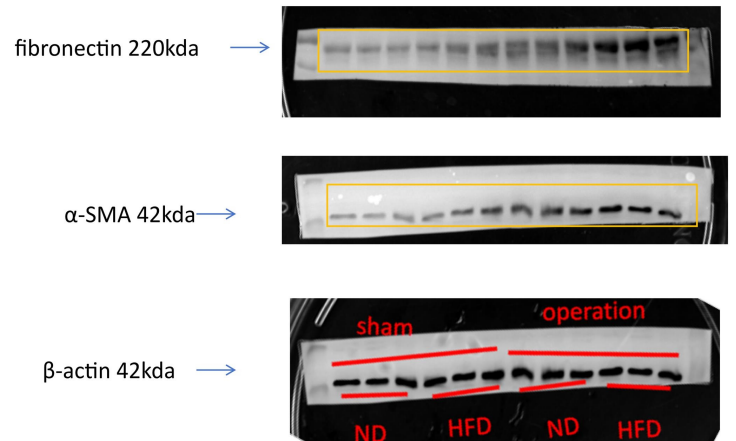

supplementary FIGURE 2D original data #1

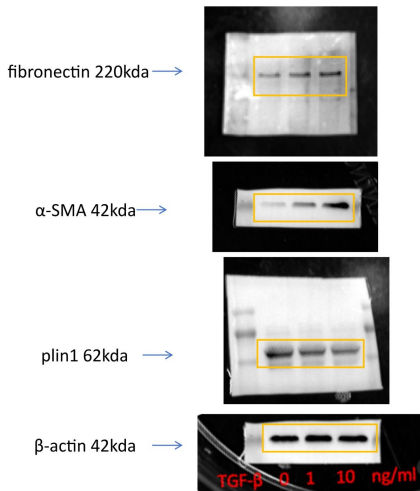

supplementary FIGURE 2D original data #2

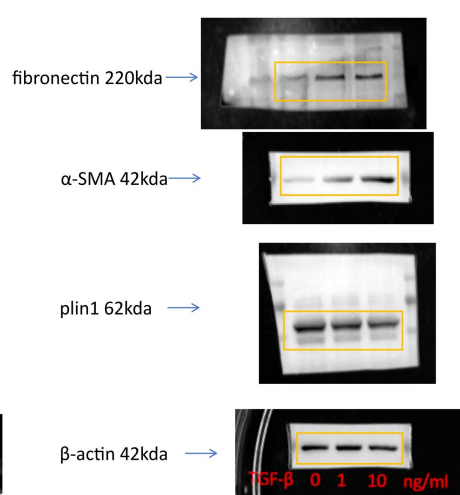

supplementary FIGURE 2D original data #3

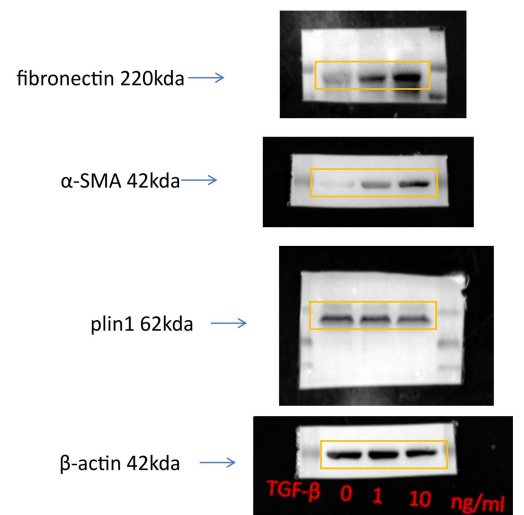

Supplement: 41536_2024_388_MOESM1_ESM.pdf [file 41536_2024_388_MOESM1_ESM.pdf]
